# Supplementary material
Source: PubMed Central journal article supplement (PMC6883118)
Supplement: NIHMS1037047-supplement-Supp_TableS1-3.pdf [file NIHMS1037047-supplement-Supp_TableS1-3.pdf]

Supplement Table 1 Clinical Characteristics and Outcomes in Relation to the BOS Endpoint

|                                   | All Subjects<br>(N=61)<br>n (%) | BOS Yes<br>(N=14)<br>n (%) | BOS No<br>(N=47)<br>n (%) | P-value |
|-----------------------------------|---------------------------------|----------------------------|---------------------------|---------|
| <b>Recipient Characteristics</b>  |                                 |                            |                           |         |
| <b>LAS Diagnosis Group</b>        |                                 |                            |                           |         |
| Group A                           | 1( 1.6)                         | 1( 7.1)                    | 0                         | 0.178   |
| Group B                           | 11(18.0)                        | 1( 7.1)                    | 10(21.3)                  |         |
| Group C                           | 29(47.5)                        | 8(57.1)                    | 21(44.7)                  |         |
| Group D                           | 20(32.8)                        | 4(28.6)                    | 16(34.0)                  |         |
| <b>Age</b>                        |                                 |                            |                           |         |
| N                                 | 61                              | 14                         | 47                        | 0.395   |
| Mean (SD)                         | 11.3 (5.46)                     | 12.4 (4.40)                | 11.0 (5.74)               |         |
| Median                            | 13                              | 14                         | 13                        |         |
| Min, Max                          | <1, 18                          | 4, 17                      | <1, 18                    |         |
| <b>Gender</b>                     |                                 |                            |                           |         |
| Male                              | 25(41.0)                        | 8(57.1)                    | 17(36.2)                  | 0.161   |
| Female                            | 36(59.0)                        | 6(42.9)                    | 30(63.8)                  |         |
| <b>Race</b>                       |                                 |                            |                           |         |
| White                             | 50(82.0)                        | 9(64.3)                    | 41(87.2)                  | 0.312   |
| Black or African American         | 5( 8.2)                         | 2(14.3)                    | 3( 6.4)                   |         |
| Asian                             | 2( 3.3)                         | 1( 7.1)                    | 1( 2.1)                   |         |
| More Than One Race                | 1( 1.6)                         | 0                          | 1( 2.1)                   | NA      |
| Unknown or Not Reported           | 3( 4.9)                         | 2(14.3)                    | 1( 2.1)                   | NA      |
| <b>Ethnicity</b>                  |                                 |                            |                           |         |
| Hispanic or Latino                | 5( 8.2)                         | 2(14.3)                    | 3( 6.4)                   | 0.578   |
| Not Hispanic or Latino            | 42(68.9)                        | 9(64.3)                    | 33(70.2)                  |         |
| Unknown or Not Reported           | 14(23.0)                        | 3(21.4)                    | 11(23.4)                  | NA      |
| <b>Type of Transplant</b>         |                                 |                            |                           |         |
| Double Lung                       | 56(91.8)                        | 14( 100)                   | 42(89.4)                  | 0.580   |
| Heart-Lung                        | 5( 8.2)                         | 0                          | 5(10.6)                   |         |
| <b>Donor and Recipient Gender</b> |                                 |                            |                           |         |
| DF, RF                            | 18(29.5)                        | 1( 7.1)                    | 17(36.2)                  | 0.072   |
| DF, RM                            | 13(21.3)                        | 2(14.3)                    | 11(23.4)                  |         |
| DM, RF                            | 18(29.5)                        | 5(35.7)                    | 13(27.7)                  |         |
| DM, RM                            | 11(18.0)                        | 5(35.7)                    | 6(12.8)                   |         |

|                                    |          |          |          |        |
|------------------------------------|----------|----------|----------|--------|
|                                    |          |          |          |        |
| <b>Induction</b>                   |          |          |          |        |
| Anti IL-2                          | 44(72.1) | 11(78.6) | 33(70.2) | 0.607  |
| rATG                               | 14(23.0) | 3(21.4)  | 11(23.4) |        |
| None                               | 3( 4.9)  | 0        | 3( 6.4)  |        |
|                                    |          |          |          |        |
| <b>Donor Gender</b>                |          |          |          |        |
| Male                               | 29(47.5) | 10(71.4) | 19(40.4) | 0.020  |
| Female                             | 31(50.8) | 3(21.4)  | 28(59.6) |        |
|                                    |          |          |          |        |
| <b>Clinical Events</b>             |          |          |          |        |
| <b>Acute Cellular Rejection</b>    |          |          |          |        |
| Yes                                | 16(26.2) | 8(57.1)  | 8(17.0)  | 0.004  |
| No                                 | 42(68.9) | 6(42.9)  | 36(76.6) |        |
|                                    |          |          |          |        |
| <b>Highest ACR Grade</b>           |          |          |          |        |
| A2 - Mild                          | 14(23.0) | 7(50.0)  | 7(14.9)  | >0.999 |
| A3 - Moderate                      | 2( 3.3)  | 1( 7.1)  | 1( 2.1)  |        |
|                                    |          |          |          |        |
| <b>Antibody Mediated Rejection</b> |          |          |          |        |
| Yes                                | 11(18.0) | 4(28.6)  | 7(14.9)  | 0.433  |
| No                                 | 47(77.0) | 10(71.4) | 37(78.7) |        |
|                                    |          |          |          |        |

ACR = Acute Cellular Rejection

BOS =- Bronchiolitis Obliterans Syndrome

LAS = Lung Allocation Score

Supplement Table 2 Clinical Characteristics and Outcomes in Relation to the Death Endpoint

|                                   | All Subjects<br>(N=61)<br>n (%) | Death Yes<br>(N=12)<br>n (%) | Death No<br>(N=49)<br>n (%) | P-value |
|-----------------------------------|---------------------------------|------------------------------|-----------------------------|---------|
| <b>Recipient Characteristics</b>  |                                 |                              |                             |         |
| <b>LAS Diagnosis Group</b>        |                                 |                              |                             |         |
| Group A                           | 1( 1.6)                         | 1( 8.3)                      | 0                           | 0.074   |
| Group B                           | 11(18.0)                        | 2(16.7)                      | 9(18.4)                     |         |
| Group C                           | 29(47.5)                        | 3(25.0)                      | 26(53.1)                    |         |
| Group D                           | 20(32.8)                        | 6(50.0)                      | 14(28.6)                    |         |
| <b>Age</b>                        |                                 |                              |                             |         |
| N                                 | 61                              | 12                           | 49                          | 0.603   |
| Mean (SD)                         | 11.3 (5.46)                     | 10.6 (6.30)                  | 11.5 (5.30)                 |         |
| Median                            | 13                              | 13                           | 13                          |         |
| Min, Max                          | <1, 18                          | 0, 17                        | <1, 18                      |         |
| <b>Gender</b>                     |                                 |                              |                             |         |
| Male                              | 25(41.0)                        | 5(41.7)                      | 20(40.8)                    | 0.957   |
| Female                            | 36(59.0)                        | 7(58.3)                      | 29(59.2)                    |         |
| <b>Race</b>                       |                                 |                              |                             |         |
| White                             | 50(82.0)                        | 10(83.3)                     | 40(81.6)                    | 0.784   |
| Black or African American         | 5( 8.2)                         | 1( 8.3)                      | 4( 8.2)                     |         |
| Asian                             | 2( 3.3)                         | 0                            | 2( 4.1)                     |         |
| More Than One Race                | 1( 1.6)                         | 1( 8.3)                      | 0                           | NA      |
| Unknown or Not Reported           | 3( 4.9)                         | 0                            | 3( 6.1)                     | NA      |
| <b>Ethnicity</b>                  |                                 |                              |                             |         |
| Hispanic or Latino                | 5( 8.2)                         | 0                            | 5(10.2)                     | 0.571   |
| Not Hispanic or Latino            | 42(68.9)                        | 8(66.7)                      | 34(69.4)                    |         |
| Unknown or Not Reported           | 14(23.0)                        | 4(33.3)                      | 10(20.4)                    | NA      |
| <b>Type of Transplant</b>         |                                 |                              |                             |         |
| Double Lung                       | 56(91.8)                        | 11(91.7)                     | 45(91.8)                    | >0.999  |
| Heart-Lung                        | 5( 8.2)                         | 1( 8.3)                      | 4( 8.2)                     |         |
| <b>Donor and Recipient Gender</b> |                                 |                              |                             |         |
| DF, RF                            | 18(29.5)                        | 2(16.7)                      | 16(32.7)                    | 0.479   |
| DF, RM                            | 13(21.3)                        | 3(25.0)                      | 10(20.4)                    |         |
| DM, RF                            | 18(29.5)                        | 5(41.7)                      | 13(26.5)                    |         |
| DM, RM                            | 11(18.0)                        | 1( 8.3)                      | 10(20.4)                    |         |

|                                    |          |         |          |        |
|------------------------------------|----------|---------|----------|--------|
|                                    |          |         |          |        |
| <b>Induction</b>                   |          |         |          |        |
| Anti IL-2                          | 44(72.1) | 9(75.0) | 35(71.4) | 0.682  |
| rATG                               | 14(23.0) | 3(25.0) | 11(22.4) |        |
| None                               | 3( 4.9)  | 0       | 3( 6.1)  |        |
|                                    |          |         |          |        |
| <b>Donor Gender</b>                |          |         |          |        |
| Male                               | 29(47.5) | 6(50.0) | 23(46.9) | 0.648  |
| Female                             | 31(50.8) | 5(41.7) | 26(53.1) |        |
|                                    |          |         |          |        |
| <b>Clinical Events</b>             |          |         |          |        |
| <b>Acute Cellular Rejection</b>    |          |         |          |        |
| Yes                                | 16(26.2) | 1( 8.3) | 15(30.6) | 0.420  |
| No                                 | 42(68.9) | 8(66.7) | 34(69.4) |        |
|                                    |          |         |          |        |
| <b>Highest ACR Grade</b>           |          |         |          |        |
| A2 - Mild                          | 14(23.0) | 1( 8.3) | 13(26.5) | >0.999 |
| A3 - Moderate                      | 2( 3.3)  | 0       | 2( 4.1)  |        |
|                                    |          |         |          |        |
| <b>Antibody Mediated Rejection</b> |          |         |          |        |
| Yes                                | 11(18.0) | 2(16.7) | 9(18.4)  | >0.999 |
| No                                 | 47(77.0) | 7(58.3) | 40(81.6) |        |
|                                    |          |         |          |        |

ACR = Acute Cellular Rejection

BOS =- Bronchiolitis Obliterans Syndrome

LAS = Lung Allocation Score

Supplement Table 3 Tacrolimus Trough By Composite Endpoint

|                                                           | <b>All Subjects<br/>(N=61)<br/>n (%)</b> | <b>Composite<br/>Endpoint Yes<br/>(N=28)<br/>n (%)</b> | <b>Composite<br/>Endpoint No<br/>(N=33)<br/>n (%)</b> | <b>P-value</b> |
|-----------------------------------------------------------|------------------------------------------|--------------------------------------------------------|-------------------------------------------------------|----------------|
| <b>Standard Deviation for<br/>Tacrolimus Trough Level</b> |                                          |                                                        |                                                       |                |
| N                                                         | 49                                       | 17                                                     | 32                                                    | 0.580          |
| Mean (SD)                                                 | 3.0 (1.58)                               | 3.2 (1.61)                                             | 2.9 (1.58)                                            |                |
| Median                                                    | 3                                        | 3                                                      | 3                                                     |                |
| Min, Max                                                  | 1, 6                                     | 1, 6                                                   | 1, 6                                                  |                |
